# Supplementary material for: Autistic Traits and Suicidal Ideation in Adolescents with Major Depressive Disorder: Is Depression a Mediator, a Predictor, or Both?
Source: Research Square preprint supplement (doi:10.21203/rs.3.rs-5994338/v1), 2025-02-12
Supplement: Supplementary file 1 [file 4de55d36fa5a74253030cfbe.docx]

**Table-1. The sociodemographic characteristics of the participants**

|  | ST-  (n=12) | ST+  (n=22) | SA  (n=36) | statistics | p |
| --- | --- | --- | --- | --- | --- |
| ***Gender, n(%)***  Female  Male | 7(58,3)  5(41,7) | 16(72,7)  6 (27,3) | 30(83,3)  6  (16,7) | *X2:*3,215 | 0,200 |
| ***Age of participants*** | 14,83±1,40 | 15,54±1,33 | 15,69±1,36 | F:1,810 | 0,172 |
| ***Maternal age*** | 45,58±5,79 | 42,18±5,79 | 43,27±5,51 | F: 1,410 | 0,251 |
| ***Psychiatric diagnosis of mother, n(%)***  Yes  No | 3(25)  9(75) | 7(31,8)  15(68,2) | 10(27,8)  21(72,2) | X2 :0,200 | 0,905 |
| **Paternal age** | 47,58±5,07 | 45,95±6,32 | 45,63±9,69 | F: 0,262 | 0,771 |
| ***Psychiatric history of father, n(%)***  Yes  No | 3(25)  9(75) | 1(4,5)  21 (95,5) | 8(22,2)  28(77,8) | X2 : 3,633 | 0,163 |
| ***Family history of suicide n(%)***  No  Yes | 9 (75)  3 (25) | 16 (72,7)  6 (27,3) | 25 (69,4)  11 (30,6) | *X2* :0,163 | 0,922 |
| ***ASD diagnosis in relatives n(%)***  No  Yes | 12 (100)  0 (0) | 21 (95,5)  1 (4,5) | 32(88,9)  4 (11,1) | *X2* :2,002 | 0,368 |

*ST: Suicidal Thoughts, SA: Suicidal Attempt, ASD: Autism Spectrum Disorder, F: Anova Test, X2 :chi squared test*

**Table-2. The Scale scores of the participants**

|  | ST-  (n=12) | ST+  (n=22) | SA  (n=36) | F/t | p |
| --- | --- | --- | --- | --- | --- |
|  | *mean±SD* | *mean±SD* | *mean±SD* |  |  |
| **BDI** | 24,33±3,74 | 28,18±7,9 | 33,38±8,20 | 7,60 | **0,001** |
| **AQ-Total** | 17,66±3,77 | 22,31±5,50 | 22,72±4,56 | 5,31 | **0,007** |
| **AQ-SS** | 2,75±1,42 | 3,86±1,95 | 4,58±2,08 | 4,10 | **0,021** |
| **AQ-C** | 2±1,90 | 4,59±2,42 | 4,41±2,30 | 5,90 | **0,004** |
| **AQ-AD** | 4,66±1,82 | 4,90±1,92 | 4,72±2,46 | 0,06 | 0,937 |
| **AQ-AS** | 4,50±1,44 | 5,59±1,65 | 5,52±1,53 | 2,27 | 0,111 |
| **AQ-I** | 3,75±1,71 | 3,36±1,81 | 3,47±1,52 | 0,21 | 0,807 |
| **C-SSRS *Suicidal Ideation***  Recent  Lifetime |  | 1,86+1,32  2,45+1,01 | 3,36+1,24  4,25+0,80 | -4,45  -7,47 | **0,001**  **0,001** |
| **C-SSRS *Intensity of Ideation***  Recent  Lifetime |  | 6,4+5,9  7,0+4,7 | 2,6+6,1  16,4+3,6 | -3,78  -8,57 | **0,001**  **0,001** |

*ST: Suicidal Thoughts, SA: Suicidal Attempt, BDI: Beck Depression Inventory, AQ: Autism-Spectrum Quotient, SS: Social skills, C: Communication, AD: Attention to details, AS: Attention shifting, I: Imagination, C-SSRS: Columbia Suicide Severity Rating Scale, F: ANOVA, t: independent sample t test*

**Table-3. The Relationship Between Suicide Behavior and Ideation Intensity with Scale Scores**

|  | C-SSRS *Suicidal Ideation* | | C-SSRS *Intensity of Ideation* | | BDI |
| --- | --- | --- | --- | --- | --- |
|  | Recent | Lifetime | Recent | Lifetime |  |
| **AQ- Total** | **0,334**** | **0,363**** | **0,298*** | **0,362**** | **0,343**** |
| **AQ- SS** | **0,315**** | 0,344 | **0,289*** | **0,393**** | **0,426**** |
| **AQ- C** | **0,277*** | **0,303*** | **0,289*** | **0,249*** | 0,235 |
| **AQ- AD** | 0,24 | 0,29 | -0,32 | 0,044 | -0,25 |
| **AQ-AS** | 0,176 | 0,217 | 0,139 | 0,142 | 0,40 |
| **AQ- I** | -0,033 | -0,011 | -0,40 | 0,050 | 0,147 |
| **BDI** | **0,527**** | **0,497**** | **0,508**** | **0,483**** | - |

***p<0,01 *p<0,05 ve r= Spearman correlation analysis*

*C-SSRS: Columbia Suicide Severity Rating Scale, AQ: Autism-Spectrum Quotient, SS: Social skills, C: Communication, AD: Attention to details, AS: Attention shifting, I: Imagination, BDI: Beck Depression Inventory*

**Table 4. Four mediation models incorporating AQ and gender as predictors and BDI scores as a mediator with current (Model a) and lifetime suicidal ideation (Model b) and current (Model c) and lifetime suicidal ideation intensity (Model d) as outcome measures**

| **Suicidal Ideation - Current** | | | | |
| --- | --- | --- | --- | --- |
| **Model (a)** | **Estimate (β)** | **Std.Error** | **Lower 95% CI** | **Upper 95% CI** |
| **Mediator Model** |  |  |  |  |
| Intercept | 17.99 | 4.13 | 9.83 | 26.29 |
| AQ | 0.61 | 0.19 | 0.24 | 0.97 |
| Gender | -4.69 | 2.17 | -8.89 | -0.41 |
| Residual SD (σ) | 7.64 | 0.66 | 6.49 | 9.11 |
| **Outcome Model** |  |  |  |  |
| Intercept | -1.37 | 0.87 | -3.06 | 0.34 |
| AQ | 0.06 | 0.04 | -0.01 | 0.13 |
| BDI | 0.08 | 0.02 | 0.04 | 0.13 |
| Gender | -0.52 | 0.41 | -1.34 | 0.31 |
| Residual SD (σ) | 1.43 | 0.12 | 1.21 | 1.69 |
| **Suicidal Ideation- Lifetime** | | | | |
| **Model (b)** | **Estimate (β)** | **Std.Error** | **Lower 95% CI** | **Upper 95% CI** |
| **Mediator Model** |  |  |  |  |
| Intercept | 17.91 | 4.06 | 9.98 | 25.76 |
| AQ | 0.62 | 0.18 | 0.26 | 0.98 |
| Gender | -4.69 | 2.11 | -8.88 | -0.51 |
| Residual SD (σ) | 7.63 | 0.67 | 6.48 | 9.09 |
| **Outcome Model** |  |  |  |  |
| Intercept | -1.31 | 0.9 | -3.11 | 0.41 |
| AQ | 0.09 | 0.04 | 0.01 | 0.16 |
| BDI | 0.08 | 0.02 | 0.03 | 0.13 |
| Gender | -0.55 | 0.44 | -1.42 | 0.29 |
| Residual SD (σ) | 1.51 | 0.13 | 1.28 | 1.8 |
| **Intensity of Ideation-Current** | | | | |
| **Model (c)** | **Estimate (β)** | **Std.Error** | **Lower 95% CI** | **Upper 95% CI** |
| **Mediator Model** |  |  |  |  |
| Intercept | 17.93 | 4.15 | 9.57 | 25.98 |
| AQ | 0.62 | 0.19 | 0.25 | 1 |
| Gender | -4.76 | 2.14 | -8.95 | -0.66 |
| Residual SD (σ) | 7.64 | 0.65 | 6.49 | 9.09 |
| **Outcome Model** |  |  |  |  |
| Intercept | -7.31 | 3.9 | -14.84 | 0.32 |
| AQ | 0.23 | 0.17 | -0.1 | 0.55 |
| BDI | 0.37 | 0.1 | 0.17 | 0.58 |
| Gender | -1.28 | 1.89 | -5.03 | 2.39 |
| Residual SD (σ) | 6.43 | 0.57 | 5.44 | 7.67 |
| **Intensity of Ideation-Lifetime** | | | | |
| **Model (d)** | **Estimate (β)** | **Std.Error** | **Lower 95% CI** | **Upper 95% CI** |
| **Mediator Model** |  |  |  |  |
| Intercept | 17.93 | 4.14 | 9.77 | 26.02 |
| AQ | 0.61 | 0.19 | 0.24 | 0.98 |
| Gender | -4.75 | 2.13 | -8.92 | -0.5 |
| Residual SD (σ) | 7.64 | 0.66 | 6.47 | 9.06 |
| **Outcome Model** |  |  |  |  |
| Intercept | -6.12 | 3.95 | -13.89 | 1.83 |
| AQ | 0.3 | 0.17 | -0.03 | 0.63 |
| BDI | 0.35 | 0.11 | 0.15 | 0.56 |
| Gender | -2.01 | 1.91 | -5.68 | 1.68 |
| Residual SD (σ) | 6.46 | 0.59 | 5.42 | 7.74 |

*AQ: Autism-Spectrum Quotient, BDI: Beck Depression Inventory*

**Table-5: Correlation Analysis Between Scales and Subscales of C-SSRS Ideation Intensity**

|  | Frequency | | Duration | | Controllability | | Deterrents | | Reasons for Ideation | |
| --- | --- | --- | --- | --- | --- | --- | --- | --- | --- | --- |
|  | R | L | R | L | R | L | R | L | R | L |
| AQ-Total | * | ** | ** | ** | - | - | - | * | ** | * |
| AQ-SS | * | ** | ** | ** | - | - | * | - | ** | * |
| AQ-C | * | * | ** | ** | - | - | - | - | - | - |
| AQ-AD | - | - | - | - | - | - | - | - | - | - |
| AQ-AS | - | - | - | - | - | - | - | - | - | - |
| AQ-I | - | - | - | - | - | - | - | - | - | - |
| BDI | ** | ** | ** | ** | ** | * | - | ** | ** | ** |

**: statistically significant correlation in positive direction, p<0,05,*

***: statistically significant correlation in positive direction, p<0,01*

*R: Recent, L: Lifetime, AQ: Autism-Spectrum Quotient, SS: Social skills, C: Communication, AD: Attention to details, AS: Attention shifting, I: Imagination, BDI: Beck Depression Inventory*
